# Supplementary material for: Fluorescent Imprinted Nanoparticles for Sensing of Chlorogenic Acid in Coffee Extracts
Source: MDPI journal article supplement (doi:10.3390/s22249874), 2022-12-15
Supplement: s1 [file s1]

# Fluorescent Imprinted Nanoparticles for Sensing of chlorogenic acid in coffee extracts

Anggy Lusanna Gutierrez-Ortíz<sup>1</sup>, Veronica Vida<sup>1</sup>, Matjaz Peterka<sup>2</sup>, Jasmina Tušar<sup>2</sup>, Federico Berti<sup>1</sup>, Luciano Navarini<sup>3</sup>, Cristina Forzato<sup>1,\*</sup>

## Supplementary Material

### Calibration curves

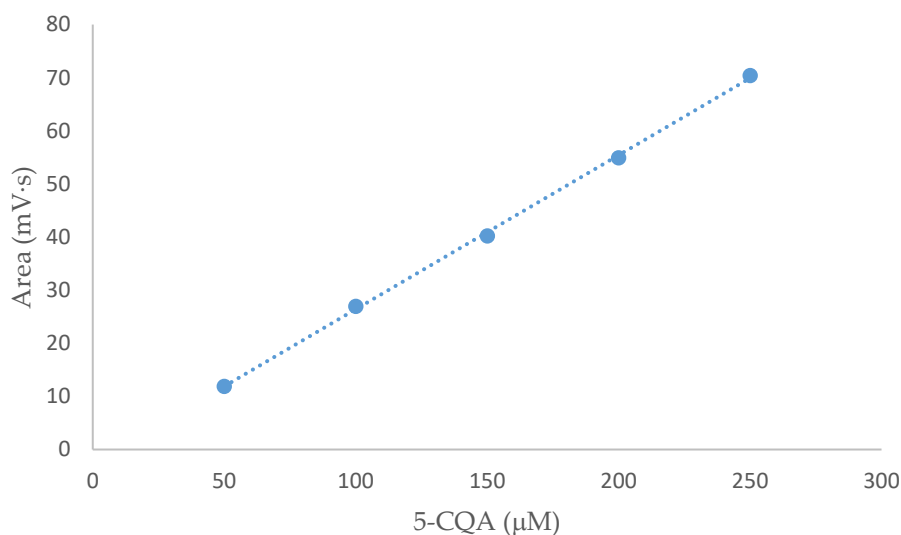

**Figure S1.** HPLC calibration for 5-CQA, average of triplicate measures. Linear regression for 5-CQA:  $r^2$  0.999, slope 0.29, intc. 2.61. Linear regression for HT:  $r^2$  0.997, slope 47.01, intc. -29.15

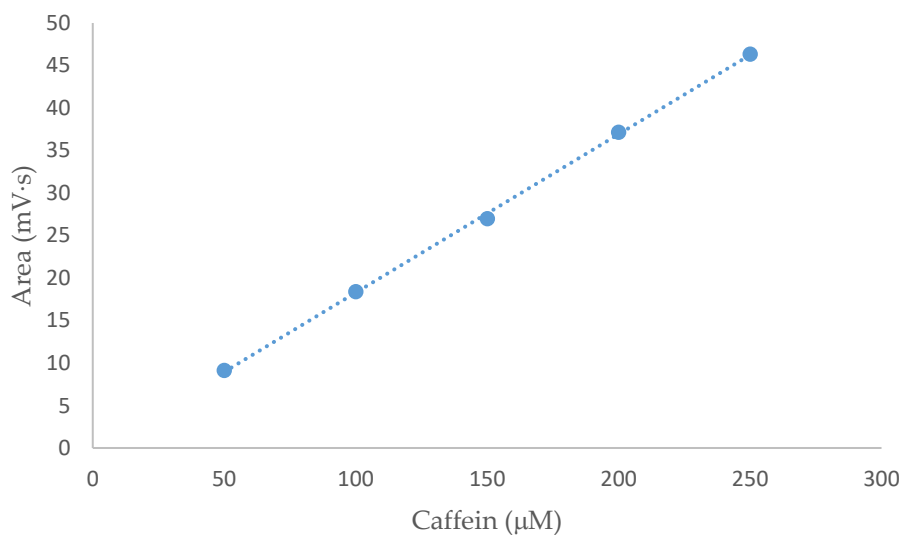

**Figure S2.** HPLC calibration for caffeine, average of triplicate measures. Linear regression:  $r^2$  0.999, slope 0.19, intc. 0.37

### Interactions of functional monomers with the targets: NMR titrations

In figures S3 – S7 are reported the most significant changes in the NMR spectra of 4VP and monomer 7 upon titration with increasing amount of 5-CQA leading to the most relevant effect.

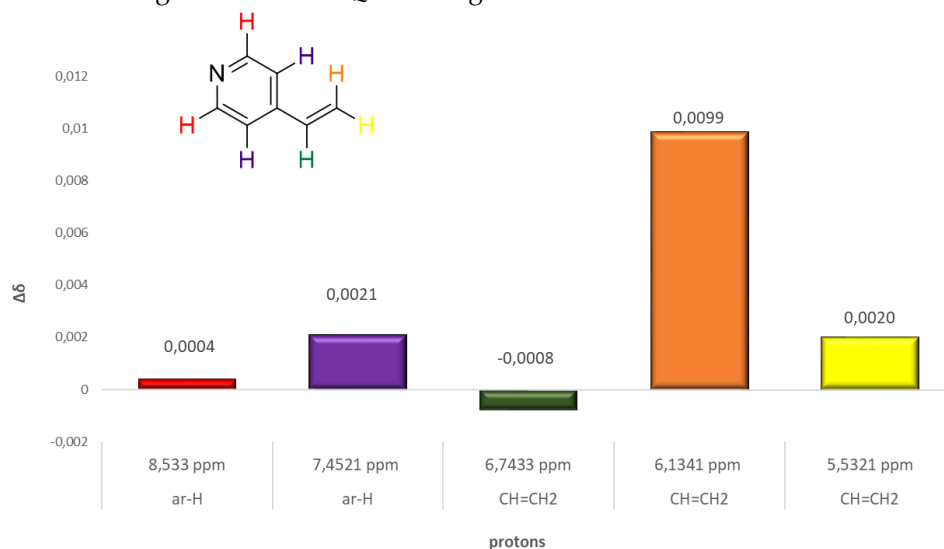

**Figure S3.** Histogram of the chemical shift variations in the  $^1\text{H}$ -NMR spectrum of 4VP upon addition of 10 equivalents of 5-CQA

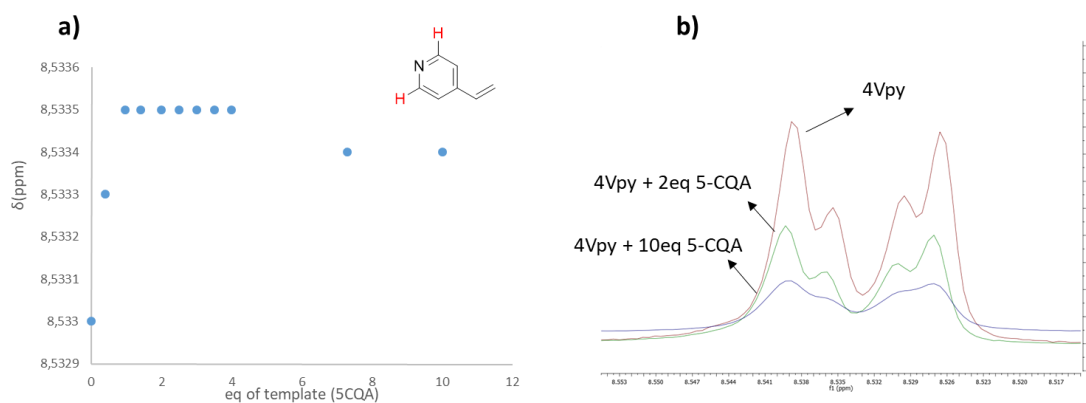

**Figure S4.** a) Chemical shift variation of aromatic proton of 4-vinylpyridine (4Vpy) upon interaction with template molecule (5-CQA). b) progressive shift of the proton aromatic protons adjacent to the nitrogen atom of the pyridine ring in the  $^1\text{H}$ -NMR spectra. Pure 4Vpy (red), addition of 2eq of 5-CQA (green) and 10eq (blue).

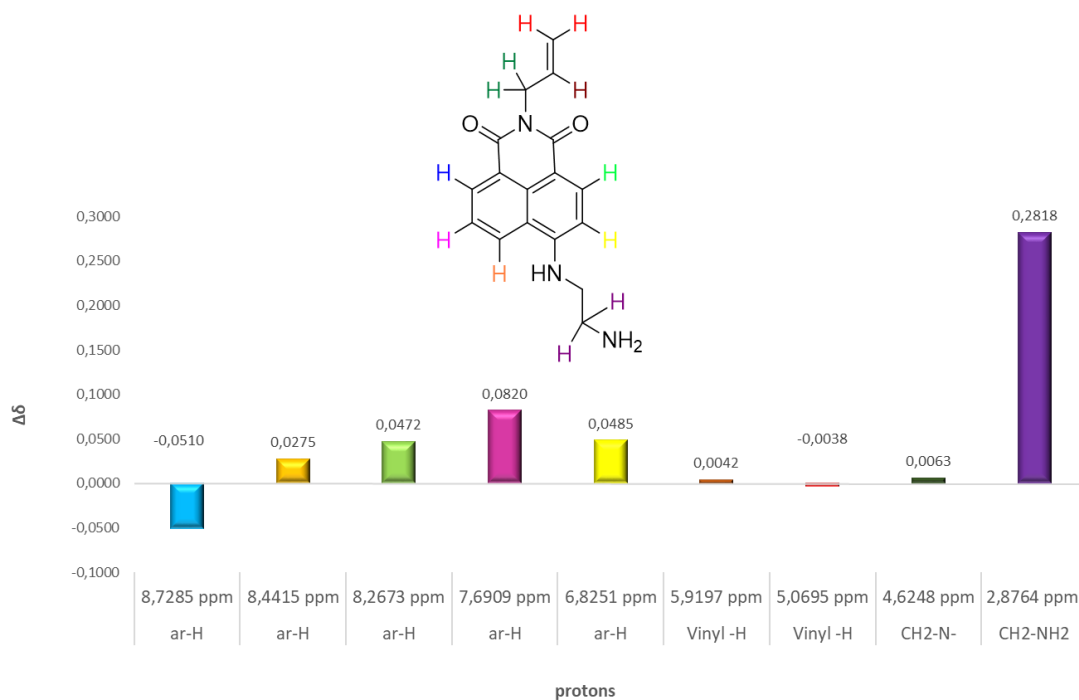

**Figure S5.** Histogram of the chemical shift variations in the  $^1\text{H}$ -NMR spectrum of **7** upon progressive additions of 10eq of 5-CQA

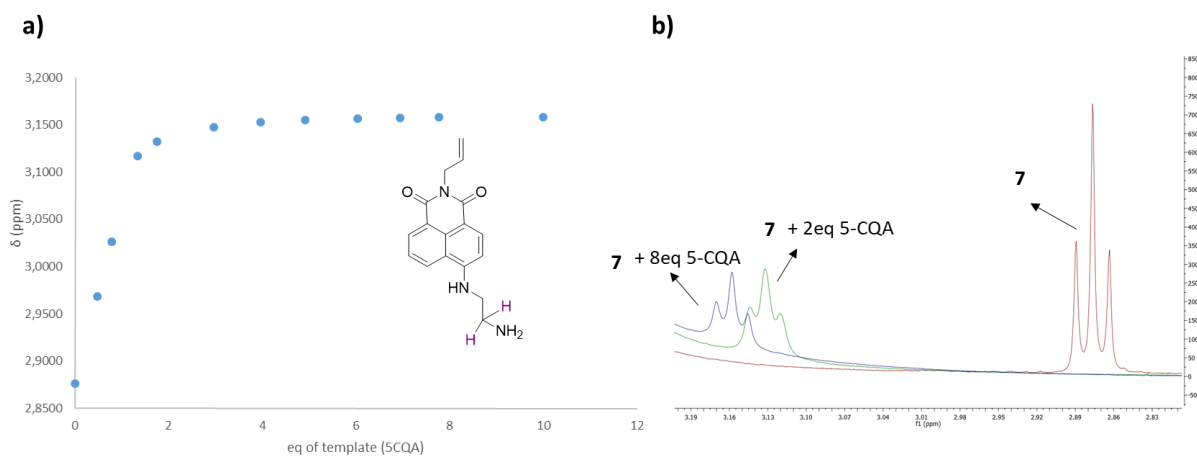

**Figure S6.** a) Chemical shift variation of  $\text{CH}_2\text{NH}_2$  protons of monomer **7** upon interaction with 5-CQA; b) progressive shift of protons  $\text{CH}_2\text{NH}_2$  in the  $^1\text{H}$ -NMR spectra.

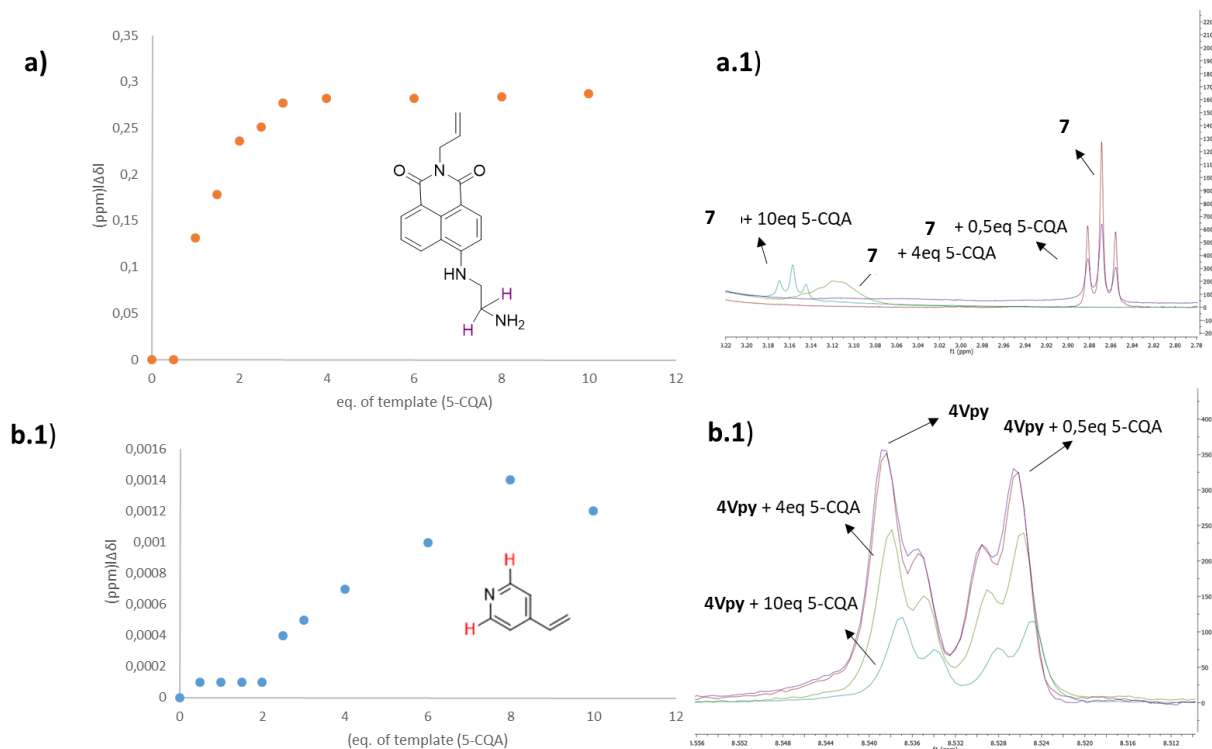

**Figure S7: a)** Chemical shift variation of  $\text{CH}_2\text{NH}_2$  protons of monomer **7** upon interaction of a monomers mix with template molecule (5-CQA). **a.1)** progressive shift of the protons  $\text{CH}_2\text{NH}_2$  in the  $^1\text{H}$ -NMR spectra: **7** (red), addition of 0.5eq of 5-CQA (purple), 4eq (green) and 10q (blue). **b)** Chemical shift variation of aromatic proton of 4VP upon interaction of a mixture of monomers and the template molecule (5-CQA). **b.1)** progressive shift of the proton Ar-H in the  $^1\text{H}$ -NMR spectra. 4VP (red), addition of 0.5eq of 5-CQA (purple), 4eq (green) and 10q (blue).

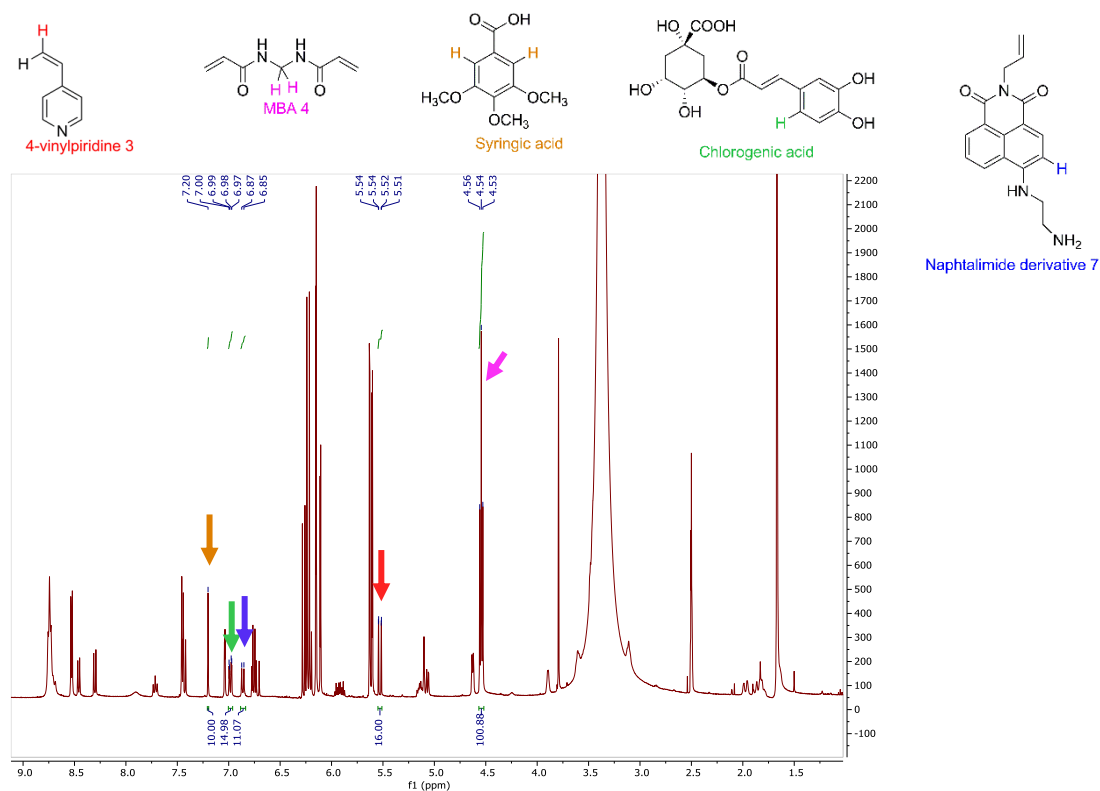

**Figure S8:** Mixture of monomers 4VP **3** and naphthalimide derivative **7**, cross-linker MBA **4**, syringic acid (internal standard) and 5-CQA in DMSO- $d_6$  before polymerization

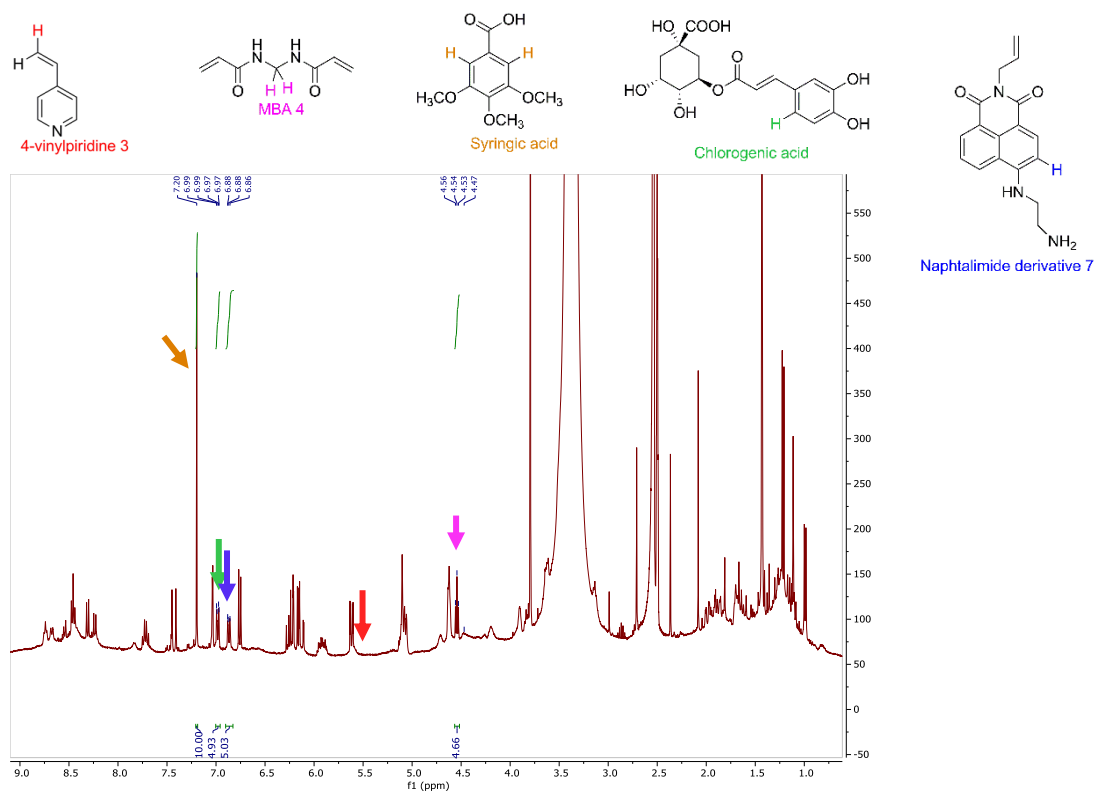

**Figure S9:** Mixture of monomers 4VP **3** and naphthalimide derivative **7**, cross-linker MBA **4**, syringic acid (internal standard) and 5-CQA in DMSO- $d_6$  after polymerization



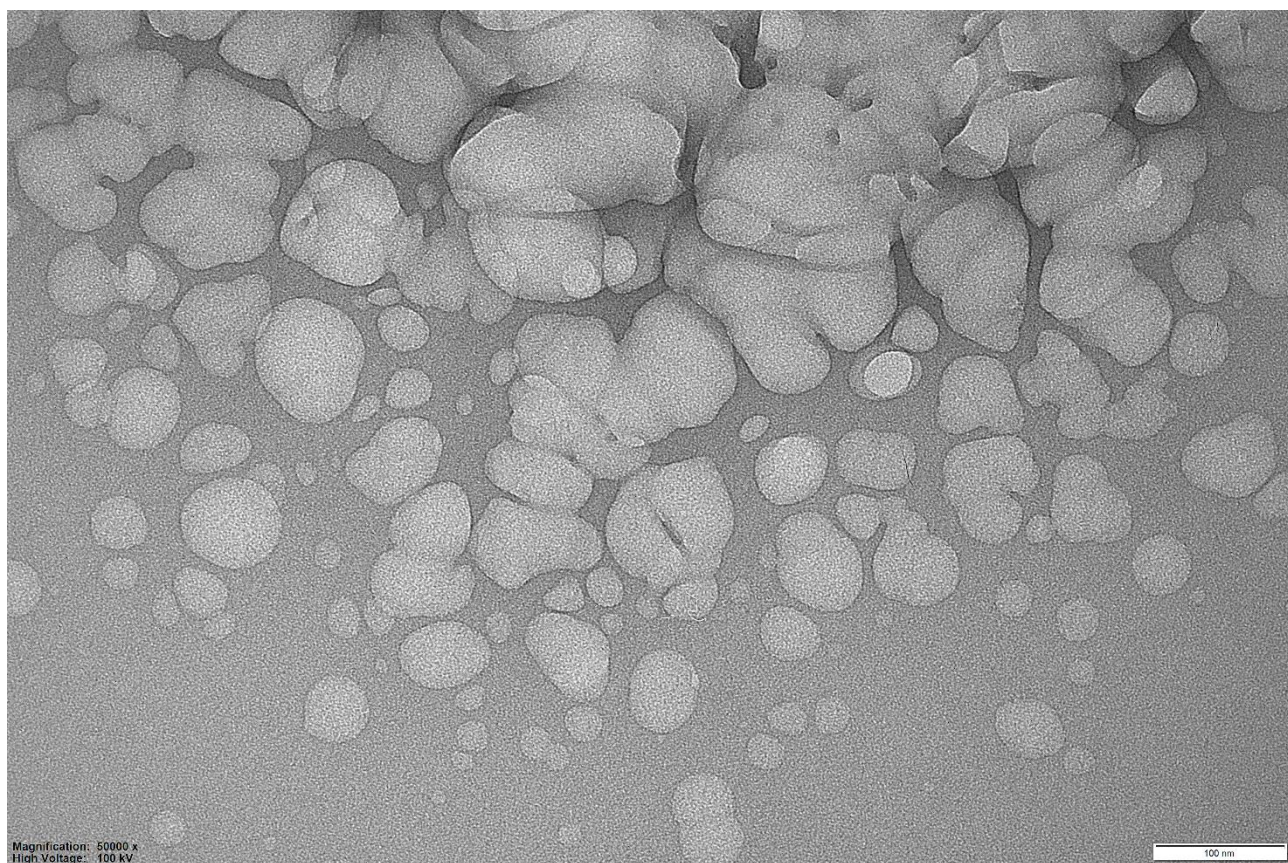

**Figure S10:** TEM image of fMIP03

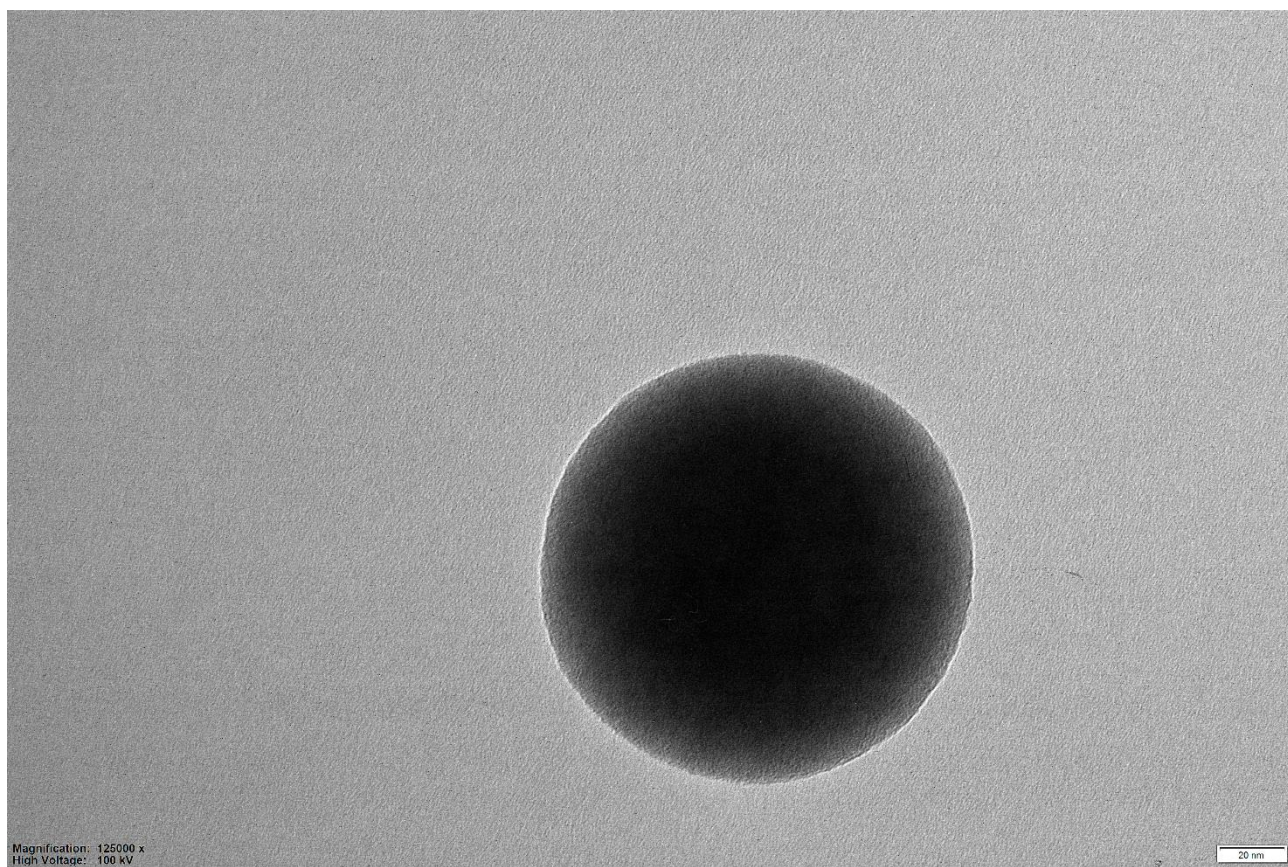

**Figure S11:** TEM image of fMIP03
